# Supplementary material for: Comparison of Physicochemical, Microbiological Properties and Bioactive Compounds Content of Grassland Honey and other Floral Origin Honeys
Source: PubMed Central journal article supplement (PMC6721125; doi:10.3390/molecules24162932), 2019-08-13
Supplement: molecules-24-02932-s001.pdf [file molecules-24-02932-s001.pdf]

## Results

**Table S1.** Results of microbiological determination of honey samples

| Honey sample | Microorganism count (cfu/g) |               |    |        |       | Honey sample | Microorganism count (cfu/g) |               |    |        |       |
|--------------|-----------------------------|---------------|----|--------|-------|--------------|-----------------------------|---------------|----|--------|-------|
|              | SPC                         | Bacillus spp. | TC | Yeasts | Molds |              | SPC                         | Bacillus spp. | TC | Yeasts | Molds |
| R1           | 40                          | -             | -  | 20     | <10   | L9           | 20                          | -             | -  | 10     | <10   |
| R2           | 30                          | -             | -  | 10     | <10   | L10          | <10                         | -             | -  | <10    | <10   |
| R3           | <10                         | -             | -  | <10    | <10   | L11          | <10                         | -             | -  | <10    | <10   |
| R4           | <10                         | -             | -  | <10    | <10   | L12          | <10                         | -             | -  | <10    | <10   |
| R5           | <10                         | -             | -  | <10    | <10   | L13          | 20                          | -             | -  | 10     | <10   |
| R6           | <10                         | -             | -  | <10    | <10   | L14          | <10                         | -             | -  | <10    | <10   |
| R7           | <10                         | -             | -  | <10    | <10   | L15          | 10                          | -             | -  | <10    | <10   |
| R8           | <10                         | -             | -  | <10    | -     | L16          | <10                         | -             | -  | <10    | <10   |
| R9           | <10                         | -             | -  | <10    | -     | L17          | <10                         | -             | -  | <10    | <10   |
| R10          | <10                         | -             | -  | <10    | -     | L18          | 10                          | -             | -  | <10    | <10   |
| R11          | 40                          | -             | -  | 20     | <10   | L19          | <10                         | -             | -  | <10    | <10   |
| R12          | <10                         | -             | -  | <10    | <10   | L20          | <10                         | -             | -  | <10    | <10   |
| R13          | <10                         | -             | -  | <10    | -     | L21          | <10                         | -             | -  | <10    | <10   |
| R14          | <10                         | -             | -  | <10    | -     | A1           | <10                         | -             | -  | <10    | <10   |
| H1           | <10                         | -             | -  | <10    | <10   | A2           | 20                          | -             | -  | 10     | <10   |
| H2           | <10                         | -             | -  | <10    | <10   | A3           | <10                         | -             | -  | <10    | <10   |
| H3           | <10                         | -             | -  | <10    | <10   | A4           | <10                         | -             | -  | <10    | <10   |
| H4           | <10                         | -             | -  | <10    | <10   | A5           | <10                         | -             | -  | <10    | 10    |
| H5           | 10                          | -             | -  | <10    | <10   | A6           | <10                         | -             | -  | <10    | <10   |
| H6           | <10                         | -             | -  | <10    | <10   | A7           | <10                         | -             | -  | <10    | <10   |
| H7           | 20                          | -             | -  | 10     | <10   | A8           | <10                         | -             | -  | <10    | 10    |
| H8           | 20                          | -             | -  | 10     | <10   | A9           | 10                          | -             | -  | <10    | <10   |
| H9           | <10                         | -             | -  | <10    | <10   | A10          | <10                         | -             | -  | <10    | -     |
| P1           | <10                         | -             | -  | <10    | <10   | A11          | <10                         | -             | -  | <10    | -     |
| P2           | <10                         | -             | -  | <10    | <10   | A12          | 20                          | -             | -  | 10     | -     |
| P3           | <10                         | -             | -  | <10    | <10   | A13          | <10                         | -             | -  | <10    | -     |
| P4           | 10                          | -             | -  | 10     | <10   | A14          | <10                         | -             | -  | <10    | <10   |
| P5           | <10                         | -             | -  | <10    | <10   | A15          | <10                         | -             | -  | 20     | <10   |
| P6           | 20                          | -             | -  | <10    | 10    | A16          | <10                         | -             | -  | <10    | <10   |
| P7           | <10                         | -             | -  | <10    | <10   | A17          | <10                         | -             | -  | <10    | -     |
| P8           | <10                         | -             | -  | <10    | <10   | A18          | <10                         | -             | -  | <10    | <10   |
| P9           | 30                          | -             | -  | 20     | <10   | A19          | <10                         | -             | -  | <10    | -     |
| P10          | <10                         | -             | -  | <10    | <10   | A20          | <10                         | -             | -  | <10    | <10   |
| P11          | <10                         | -             | -  | <10    | <10   | A21          | <10                         | -             | -  | <10    | <10   |
| P12          | <10                         | -             | -  | 10     | <10   | G1           | <10                         | -             | -  | <10    | <10   |
| P13          | <10                         | -             | -  | <10    | 10    | G2           | <10                         | -             | -  | <10    | -     |

|     |     |   |   |     |     |     |     |   |   |     |     |
|-----|-----|---|---|-----|-----|-----|-----|---|---|-----|-----|
| P14 | <10 | - | - | <10 | <10 | G3  | -   | - | - | -   | -   |
| P15 | <10 | - | - | <10 | <10 | G4  | -   | - | - | -   | -   |
| P16 | <10 | - | - | <10 | <10 | G5  | <10 | - | - | <10 | <10 |
| L1  | <10 | - | - | -   | <10 | G6  | <10 | - | - | <10 | -   |
| L2  | <10 | - | - | <10 | 10  | G7  | <10 | - | - | -   | -   |
| L3  | <10 | - | - | <10 | <10 | G8  | <10 | - | - | <10 | -   |
| L4  | 30  | - | - | 20  | <10 | G9  | <10 | - | - | <10 | -   |
| L5  | <10 | - | - | -   | <10 | G10 | <10 | - | - | <10 | -   |
| L6  | <10 | - | - | <10 | <10 | G11 | <10 | - | - | <10 | -   |
| L7  | <10 | - | - | <10 | <10 | G12 | -   | - | - | -   | -   |
| L8  | <10 | - | - | <10 | <10 |     |     |   |   |     |     |

\*R- rape honey; H- honeydew; L- linden honey; P- polyfloral honey; A -acacia honey; G-grassland honey (- absent).

Table S2: Physicochemical parameters of different type of honey from Romania

| Sam ple no. | Water content, % | L*    | a*    | b*    | Chroma | H angle, degrees | Con duct ivity, mS/cm | Visco sity, Pa*s | Sam ple no. | Water content, % | L*    | a*    | b*    | Chroma | H angle, degrees | Con duct ivity, mS/cm | Vis co sity, Pa*s |
|-------------|------------------|-------|-------|-------|--------|------------------|-----------------------|------------------|-------------|------------------|-------|-------|-------|--------|------------------|-----------------------|-------------------|
| R1          | 17.20            | 21.67 | -0.31 | 6.23  | 3.05   | 87.09            | 0.11                  | 11.65            | L9          | 17.10            | 31.7  | -0.27 | 14.31 | 4.30   | 88.92            | 0.61                  | 6.24              |
| R2          | 16.90            | 25.87 | -0.14 | 7.45  | 3.10   | 88.81            | 0.16                  | 13.24            | L10         | 16.50            | 33.22 | -0.13 | 13.42 | 4.02   | 89.45            | 0.57                  | 7.46              |
| R3          | 16.70            | 19.06 | -0.38 | 6.17  | 3.10   | 86.51            | 0.12                  | 12.28            | L11         | 17.00            | 33.49 | -0.56 | 12.89 | 4.34   | 87.51            | 0.58                  | 7.01              |
| R4          | 17.30            | 22.18 | -0.56 | 4.98  | 2.98   | 83.65            | 0.16                  | 14.73            | L12         | 17.20            | 35.27 | -0.48 | 14.38 | 4.48   | 88.09            | 0.61                  | 5.17              |
| R5          | 16.90            | 38.07 | -1.69 | 15.69 | 5.26   | 83.65            | 0.15                  | 11.82            | L13         | 16.80            | 34.83 | -0.31 | 14.29 | 4.34   | 88.76            | 0.60                  | 8.06              |
| R6          | 17.80            | 30.65 | -1.27 | 5.37  | 3.44   | 76.77            | 0.17                  | 10.96            | L14         | 17.10            | 32.71 | -0.92 | 13.26 | 4.60   | 86.03            | 0.61                  | 7.62              |
| R7          | 17.80            | 27.41 | -0.93 | 7.21  | 3.65   | 82.50            | 0.12                  | 12.63            | L15         | 16.00            | 31.65 | -0.84 | 14.67 | 4.75   | 86.72            | 0.55                  | 4.89              |
| R8          | 17.90            | 24.85 | -0.20 | 5.63  | 2.82   | 88.23            | 0.15                  | 12.41            | L16         | 17.80            | 35.23 | -0.38 | 13.81 | 4.33   | 88.43            | 0.63                  | 5.83              |
| R9          | 18.00            | 25.14 | -0.28 | 4.56  | 2.66   | 86.51            | 0.19                  | 11.98            | L17         | 16.50            | 33.45 | -0.21 | 13.45 | 4.13   | 89.11            | 0.59                  | 7.22              |
| R10         | 16.90            | 22.98 | -0.51 | 7.85  | 3.52   | 86.51            | 0.11                  | 13.85            | L18         | 17.90            | 34.92 | -1.21 | 13.98 | 4.84   | 85.05            | 0.69                  | 6.68              |
| R11         | 17.50            | 26.72 | -0.16 | 6.22  | 2.89   | 88.81            | 0.13                  | 11.47            | L19         | 17.00            | 31.76 | -1.04 | 12.43 | 4.55   | 85.22            | 0.62                  | 5.28              |
| R12         | 17.20            | 17.61 | -1.25 | 8.17  | 3.98   | 81.36            | 0.16                  | 13.72            | L20         | 17.40            | 33.16 | -0.42 | 13.97 | 4.39   | 88.28            | 0.64                  | 7.16              |
| R13         | 17.70            | 29.02 | -0.34 | 5.54  | 2.94   | 86.51            | 0.14                  | 12.74            | L21         | 16.60            | 32.89 | -0.25 | 14.34 | 4.29   | 89.00            | 0.58                  | 4.76              |
| R14         | 16.80            | 33.68 | -2.19 | 18.61 | 5.79   | 83.08            | 0.11                  | 14.29            | A1          | 17.10            | 45.28 | -0.76 | 16.25 | 4.90   | 87.32            | 0.23                  | 3.67              |
| H1          | 15.90            | 19.67 | 9.29  | 8.35  | 5.94   | 41.82            | 0.58                  | 9.47             | A2          | 17.80            | 47.87 | -1.16 | 14.62 | 4.90   | 85.46            | 0.32                  | 3.98              |
| H2          | 16.20            | 21.41 | 7.62  | 6.92  | 5.39   | 42.40            | 0.65                  | 7.65             | A3          | 17.30            | 49.12 | -1.39 | 14.98 | 5.05   | 84.70            | 0.25                  | 2.14              |
| H3          | 17.40            | 21.14 | 5.98  | 7.13  | 5.12   | 49.84            | 0.69                  | 8.71             | A4          | 16.90            | 50.38 | -0.45 | 16.38 | 4.72   | 88.43            | 0.22                  | 4.08              |
| H4          | 17.90            | 23.72 | 6.52  | 10.17 | 5.74   | 57.29            | 0.73                  | 8.92             | A5          | 17.10            | 46.12 | -1.54 | 14.92 | 5.10   | 84.11            | 0.28                  | 3.15              |
| H5          | 16.90            | 21.56 | 7.23  | 9.67  | 5.80   | 53.28            | 0.66                  | 7.14             | A6          | 16.90            | 48.18 | -0.83 | 13.28 | 4.56   | 86.43            | 0.24                  | 3.78              |
| H6          | 16.50            | 21.08 | 7.14  | 10.24 | 5.87   | 55.00            | 0.59                  | 9.12             | A7          | 16.70            | 45.96 | -1.26 | 14.82 | 4.97   | 85.14            | 0.27                  | 4.14              |
| H7          | 16.80            | 22.39 | 6.28  | 8.37  | 5.40   | 53.28            | 0.64                  | 8.61             | A8          | 17.50            | 46.24 | -0.83 | 16.34 | 4.95   | 87.09            | 0.30                  | 2.54              |
| H8          | 15.70            | 23.84 | 5.35  | 6.17  | 4.80   | 49.27            | 0.57                  | 8.56             | A9          | 16.70            | 48.22 | -1.69 | 14.18 | 5.07   | 83.20            | 0.26                  | 4.27              |
| H9          | 16.30            | 20.59 | 8.16  | 8.22  | 5.72   | 45.26            | 0.61                  | 7.98             | A10         | 16.50            | 52.39 | -1.34 | 15.12 | 5.05   | 84.94            | 0.22                  | 3.29              |
| P1          | 17.50            | 36.82 | 5.16  | 13.56 | 5.95   | 69.17            | 0.40                  | 6.25             | A11         | 18.00            | 50.16 | -0.98 | 15.69 | 4.95   | 86.43            | 0.35                  | 3.62              |
| P2          | 17.90            | 35.15 | 3.99  | 13.98 | 5.74   | 74.07            | 0.42                  | 8.21             | A12         | 17.60            | 51.49 | -1.29 | 14.89 | 4.99   | 85.05            | 0.33                  | 2.96              |
| P3          | 16.20            | 37.24 | 3.89  | 12.74 | 5.54   | 73.02            | 0.35                  | 4.18             | A13         | 17.20            | 48.64 | -0.73 | 16.27 | 4.89   | 87.43            | 0.30                  | 3.46              |
| P4          | 17.30            | 33.19 | 4.23  | 13.99 | 5.80   | 73.18            | 0.42                  | 6.82             | A14         | 16.80            | 47.29 | -0.89 | 15.56 | 4.89   | 86.73            | 0.28                  | 3.89              |
| P5          | 16.40            | 35.67 | 4.78  | 14.82 | 6.04   | 72.12            | 0.38                  | 7.18             | A15         | 17.50            | 50.62 | -1.19 | 13.25 | 4.73   | 84.87            | 0.31                  | 2.12              |
| P6          | 15.90            | 36.73 | 4.45  | 13.25 | 5.75   | 71.44            | 0.32                  | 4.98             | A16         | 17.20            | 51.27 | -1.27 | 16.38 | 5.17   | 85.57            | 0.29                  | 2.56              |

|            |       |       |       |       |      |       |      |      |            |       |       |       |       |      |       |      |      |
|------------|-------|-------|-------|-------|------|-------|------|------|------------|-------|-------|-------|-------|------|-------|------|------|
| <b>P7</b>  | 16.80 | 36.09 | 5.48  | 13.65 | 6.04 | 68.13 | 0.41 | 8.28 | <b>A17</b> | 16.40 | 51.73 | -1.08 | 13.95 | 4.77 | 85.57 | 0.25 | 3.25 |
| <b>P8</b>  | 16.60 | 35.04 | 5.35  | 14.28 | 6.09 | 69.46 | 0.39 | 6.87 | <b>A18</b> | 16.90 | 52.61 | -1.13 | 13.25 | 4.70 | 85.13 | 0.28 | 4.07 |
| <b>P9</b>  | 17.30 | 38.73 | 5.67  | 14.63 | 6.21 | 68.82 | 0.44 | 5.36 | <b>A19</b> | 17.60 | 51.37 | -1.56 | 16.29 | 5.29 | 84.53 | 0.31 | 2.86 |
| <b>P10</b> | 16.90 | 37.81 | 3.24  | 13.38 | 5.46 | 76.39 | 0.41 | 8.62 | <b>A20</b> | 16.30 | 49.28 | -1.27 | 14.37 | 4.92 | 84.95 | 0.27 | 3.52 |
| <b>P11</b> | 16.10 | 38.08 | 5.98  | 13.61 | 6.13 | 66.28 | 0.28 | 5.84 | <b>A21</b> | 17.80 | 50.15 | -0.72 | 15.28 | 4.76 | 87.30 | 0.33 | 2.92 |
| <b>P12</b> | 17.70 | 32.83 | 5.12  | 14.28 | 6.04 | 70.28 | 0.45 | 6.50 | <b>G1</b>  | 17.60 | 34.56 | 2.11  | 12.59 | 5.00 | 80.49 | 0.28 | 8.64 |
| <b>P13</b> | 17.10 | 35.61 | 4.06  | 12.94 | 5.61 | 72.58 | 0.42 | 5.12 | <b>G2</b>  | 17.20 | 29.34 | 6.29  | 12.15 | 5.99 | 62.63 | 0.35 | 6.39 |
| <b>P14</b> | 15.90 | 39.65 | 4.56  | 13.99 | 5.88 | 71.95 | 0.35 | 7.08 | <b>G3</b>  | 16.30 | 29.66 | 1.07  | 13.16 | 4.66 | 85.35 | 0.29 | 7.12 |
| <b>P15</b> | 16.80 | 31.90 | 4.78  | 13.82 | 5.90 | 70.92 | 0.38 | 6.62 | <b>G4</b>  | 16.70 | 32.14 | 3.89  | 14.09 | 5.73 | 74.57 | 0.33 | 8.05 |
| <b>P16</b> | 16.10 | 37.56 | 4.28  | 13.46 | 5.74 | 72.36 | 0.33 | 8.12 | <b>G5</b>  | 16.90 | 34.63 | 0.31  | 14.59 | 4.38 | 88.78 | 0.34 | 8.29 |
| <b>L1</b>  | 16.90 | 31.97 | -0.36 | 14.94 | 4.47 | 88.62 | 0.62 | 5.38 | <b>G6</b>  | 17.60 | 32.71 | 0.92  | 13.51 | 4.63 | 86.11 | 0.24 | 7.76 |
| <b>L2</b>  | 17.90 | 27.92 | -0.78 | 13.72 | 4.59 | 86.75 | 0.72 | 6.15 | <b>G7</b>  | 17.30 | 31.75 | 1.84  | 13.25 | 5.00 | 82.10 | 0.28 | 8.17 |
| <b>L3</b>  | 16.70 | 35.14 | -0.12 | 14.41 | 4.14 | 89.52 | 0.60 | 7.04 | <b>G8</b>  | 16.90 | 35.23 | 0.38  | 14.37 | 4.41 | 88.49 | 0.31 | 8.54 |
| <b>L4</b>  | 16.90 | 33.29 | -0.28 | 14.19 | 4.30 | 88.87 | 0.61 | 6.21 | <b>G9</b>  | 17.10 | 33.35 | 2.21  | 12.23 | 4.98 | 79.76 | 0.34 | 7.23 |
| <b>L5</b>  | 16.30 | 32.68 | -0.34 | 13.49 | 4.26 | 88.56 | 0.59 | 5.78 | <b>G10</b> | 16.90 | 34.92 | 1.21  | 13.06 | 4.71 | 84.71 | 0.28 | 8.2  |
| <b>L6</b>  | 17.60 | 35.07 | -0.35 | 12.59 | 4.14 | 88.41 | 0.66 | 7.37 | <b>G11</b> | 16.70 | 31.90 | 1.04  | 13.08 | 4.64 | 85.46 | 0.32 | 7.14 |
| <b>L7</b>  | 17.20 | 31.18 | -0.67 | 13.56 | 4.50 | 87.17 | 0.63 | 5.92 | <b>G12</b> | 17.10 | 33.06 | 0.42  | 13.67 | 4.35 | 88.24 | 0.35 | 6.99 |
| <b>L8</b>  | 16.90 | 32.63 | -0.34 | 14.72 | 4.42 | 88.68 | 0.59 | 6.54 |            |       |       |       |       |      |       |      |      |

Table S3: Sugars content of different type of honey from the North of Romania

|            | Glucose,g/100g | Fructose, g/100g | Sucrose,g/100g | Trehalose,g/100g | Melezitose,g/100g | Maltose,g/100g | Eriose,g/100g | Turanose,g/100g | Raffinose,g/100g | G/F  | GW   |
|------------|----------------|------------------|----------------|------------------|-------------------|----------------|---------------|-----------------|------------------|------|------|
| <b>R1</b>  | 42.55          | 28.58            | 1.60           | 0.00             | 0.00              | 0.26           | 0.00          | 0.12            | 0.00             | 1.48 | 2.47 |
| <b>R2</b>  | 42.04          | 28.74            | 0.00           | 0.00             | 0.00              | 0.32           | 0.00          | 0.12            | 0.01             | 1.46 | 2.48 |
| <b>R3</b>  | 41.70          | 29.12            | 0.01           | 0.01             | 0.00              | 0.93           | 0.00          | 0.10            | 0.00             | 1.43 | 2.49 |
| <b>R4</b>  | 41.58          | 29.14            | 0.00           | 0.01             | 0.00              | 0.33           | 0.00          | 0.34            | 0.20             | 1.42 | 2.40 |
| <b>R5</b>  | 40.73          | 29.73            | 0.32           | 0.01             | 0.01              | 0.06           | 0.10          | 0.45            | 0.00             | 1.36 | 2.41 |
| <b>R6</b>  | 40.42          | 30.01            | 1.59           | 0.01             | 0.01              | 0.00           | 0.00          | 0.31            | 0.02             | 1.34 | 2.27 |
| <b>R7</b>  | 39.79          | 30.24            | 1.45           | 0.01             | 0.01              | 0.00           | 0.00          | 0.28            | 0.01             | 1.31 | 2.23 |
| <b>R8</b>  | 39.37          | 30.50            | 0.97           | 0.01             | 0.01              | 0.00           | 0.00          | 0.12            | 0.01             | 1.29 | 2.20 |
| <b>R9</b>  | 39.13          | 30.87            | 1.77           | 0.02             | 0.02              | 1.03           | 0.00          | 0.05            | 0.43             | 1.26 | 2.17 |
| <b>R10</b> | 38.86          | 31.01            | 0.93           | 0.02             | 0.02              | 1.25           | 0.00          | 0.02            | 0.01             | 1.25 | 2.30 |
| <b>R11</b> | 38.52          | 31.15            | 1.49           | 0.02             | 0.02              | 0.00           | 0.00          | 0.06            | 0.02             | 1.23 | 2.20 |
| <b>R12</b> | 38.35          | 31.52            | 0.79           | 0.02             | 0.02              | 0.00           | 0.00          | 0.07            | 0.02             | 1.21 | 2.23 |
| <b>R13</b> | 38.25          | 31.54            | 0.57           | 0.03             | 0.02              | 0.00           | 0.00          | 0.30            | 0.00             | 1.21 | 2.16 |
| <b>R14</b> | 38.02          | 31.54            | 1.63           | 0.03             | 0.02              | 0.00           | 0.00          | 0.05            | 0.01             | 1.20 | 2.26 |
| <b>H1</b>  | 37.21          | 32.14            | 0.74           | 0.03             | 4.18              | 0.00           | 0.04          | 0.06            | 0.02             | 1.15 | 2.34 |
| <b>H2</b>  | 37.01          | 32.20            | 1.80           | 0.04             | 1.24              | 0.00           | 0.00          | 0.07            | 0.02             | 1.14 | 2.28 |
| <b>H3</b>  | 36.92          | 32.28            | 1.36           | 0.04             | 4.47              | 0.00           | 0.49          | 0.20            | 0.01             | 1.14 | 2.12 |
| <b>H4</b>  | 36.42          | 32.32            | 1.41           | 0.04             | 4.75              | 0.00           | 1.54          | 0.12            | 0.01             | 1.12 | 2.03 |
| <b>H5</b>  | 36.39          | 32.43            | 1.31           | 0.04             | 5.56              | 0.00           | 0.75          | 0.16            | 0.00             | 1.12 | 2.15 |
| <b>H6</b>  | 36.20          | 32.45            | 1.52           | 0.04             | 5.76              | 0.76           | 0.00          | 0.13            | 0.02             | 1.11 | 2.19 |
| <b>H7</b>  | 36.16          | 32.60            | 1.34           | 0.04             | 5.77              | 0.50           | 0.18          | 0.09            | 0.01             | 1.10 | 2.15 |
| <b>H8</b>  | 35.72          | 32.62            | 1.45           | 0.04             | 5.78              | 0.52           | 0.00          | 0.07            | 0.00             | 1.09 | 2.27 |
| <b>H9</b>  | 35.68          | 32.68            | 1.32           | 0.04             | 5.84              | 0.69           | 0.79          | 0.03            | 0.00             | 1.09 | 2.18 |
| <b>P1</b>  | 32.31          | 37.54            | 0.71           | 0.23             | 0.58              | 0.05           | 0.00          | 0.17            | 0.01             | 0.86 | 1.84 |
| <b>P2</b>  | 32.31          | 37.63            | 1.08           | 0.23             | 0.58              | 0.00           | 8.85          | 0.00            | 0.02             | 0.85 | 1.80 |
| <b>P3</b>  | 32.30          | 37.68            | 0.58           | 0.23             | 0.61              | 0.00           | 0.24          | 0.23            | 0.05             | 0.85 | 1.99 |
| <b>P4</b>  | 32.18          | 38.03            | 1.07           | 0.24             | 0.61              | 0.00           | 0.00          | 0.22            | 0.04             | 0.84 | 1.86 |
| <b>P5</b>  | 32.18          | 38.13            | 0.19           | 0.24             | 0.62              | 0.00           | 3.23          | 0.07            | 0.04             | 0.84 | 1.96 |
| <b>P6</b>  | 32.13          | 38.27            | 0.56           | 0.24             | 0.63              | 0.00           | 0.03          | 0.44            | 0.01             | 0.83 | 2.02 |
| <b>P7</b>  | 32.08          | 38.41            | 1.83           | 0.24             | 0.64              | 0.00           | 0.02          | 0.08            | 0.02             | 0.83 | 1.91 |
| <b>P8</b>  | 31.96          | 38.71            | 1.95           | 0.24             | 0.66              | 0.00           | 0.18          | 0.16            | 0.02             | 0.82 | 1.92 |
| <b>P9</b>  | 31.95          | 38.74            | 1.94           | 0.24             | 0.68              | 0.00           | 0.18          | 0.64            | 0.05             | 0.82 | 1.84 |
| <b>P10</b> | 31.91          | 38.82            | 1.47           | 0.24             | 0.69              | 0.00           | 0.51          | 0.10            | 0.03             | 0.82 | 1.88 |
| <b>P11</b> | 31.81          | 38.86            | 1.50           | 0.26             | 0.72              | 0.00           | 0.00          | 0.19            | 0.01             | 0.81 | 1.97 |

|     |       |       |      |      |      |      |      |      |      |      |      |
|-----|-------|-------|------|------|------|------|------|------|------|------|------|
| P12 | 31.71 | 39.00 | 1.40 | 0.26 | 0.72 | 0.00 | 6.39 | 0.71 | 0.01 | 0.81 | 1.79 |
| P13 | 31.66 | 39.13 | 1.12 | 0.27 | 0.77 | 0.00 | 0.00 | 0.06 | 0.02 | 0.80 | 1.85 |
| P14 | 31.66 | 39.19 | 1.50 | 0.27 | 0.77 | 0.00 | 0.00 | 0.21 | 0.03 | 0.80 | 1.99 |
| P15 | 31.65 | 39.34 | 0.22 | 0.28 | 0.94 | 0.00 | 0.00 | 0.16 | 0.04 | 0.80 | 1.88 |
| P16 | 31.62 | 39.35 | 0.75 | 0.28 | 1.12 | 0.08 | 0.00 | 0.23 | 0.03 | 0.80 | 1.96 |
| L1  | 31.56 | 39.43 | 1.45 | 0.28 | 1.13 | 0.06 | 0.00 | 0.18 | 0.04 | 0.80 | 1.86 |
| L2  | 31.56 | 39.45 | 0.29 | 0.28 | 1.30 | 0.01 | 0.00 | 0.02 | 0.00 | 0.80 | 1.76 |
| L3  | 31.52 | 39.55 | 0.15 | 0.29 | 1.36 | 0.02 | 0.07 | 0.22 | 0.38 | 0.79 | 1.88 |
| L4  | 31.47 | 39.83 | 1.22 | 0.29 | 1.50 | 0.01 | 0.01 | 0.02 | 0.03 | 0.79 | 1.86 |
| L5  | 31.43 | 40.20 | 0.30 | 0.30 | 1.62 | 0.23 | 0.00 | 0.24 | 0.19 | 0.78 | 1.92 |
| L6  | 31.08 | 40.28 | 1.67 | 0.30 | 1.73 | 2.34 | 0.68 | 0.00 | 0.00 | 0.77 | 1.76 |
| L7  | 30.93 | 40.41 | 0.29 | 0.31 | 1.74 | 0.00 | 0.07 | 0.19 | 0.09 | 0.76 | 1.79 |
| L8  | 30.90 | 40.50 | 0.84 | 0.31 | 1.83 | 0.00 | 0.07 | 0.04 | 0.04 | 0.76 | 1.82 |
| L9  | 30.89 | 40.51 | 0.31 | 0.31 | 1.94 | 0.00 | 0.02 | 0.04 | 0.00 | 0.76 | 1.80 |
| L10 | 30.89 | 40.56 | 0.22 | 0.32 | 2.01 | 0.00 | 0.00 | 0.03 | 0.00 | 0.76 | 1.87 |
| L11 | 30.83 | 40.57 | 0.66 | 0.32 | 2.09 | 0.00 | 0.17 | 0.03 | 0.00 | 0.76 | 1.81 |
| L12 | 30.81 | 40.63 | 0.51 | 0.33 | 2.09 | 0.00 | 0.04 | 0.00 | 0.02 | 0.75 | 1.79 |
| L13 | 30.74 | 40.69 | 0.16 | 0.33 | 2.10 | 0.00 | 0.33 | 0.02 | 0.03 | 0.75 | 1.83 |
| L14 | 30.71 | 40.70 | 0.08 | 0.34 | 2.18 | 0.00 | 0.00 | 0.02 | 0.01 | 0.75 | 1.79 |
| L15 | 30.64 | 40.71 | 0.24 | 0.34 | 2.33 | 0.00 | 0.01 | 0.40 | 0.03 | 0.75 | 1.91 |
| L16 | 30.64 | 40.91 | 0.16 | 0.34 | 2.34 | 0.17 | 0.01 | 0.01 | 0.04 | 0.74 | 1.72 |
| L17 | 30.43 | 40.97 | 0.64 | 0.35 | 2.35 | 0.23 | 0.04 | 0.08 | 0.01 | 0.74 | 1.84 |
| L18 | 30.43 | 41.00 | 0.24 | 0.35 | 2.38 | 0.93 | 0.02 | 0.11 | 0.01 | 0.74 | 1.70 |
| L19 | 30.42 | 41.01 | 0.54 | 0.36 | 2.43 | 0.06 | 0.00 | 0.18 | 0.01 | 0.74 | 1.78 |
| L20 | 30.30 | 41.10 | 0.39 | 0.37 | 2.55 | 0.01 | 0.03 | 0.11 | 0.04 | 0.73 | 1.74 |
| L21 | 30.39 | 41.15 | 0.37 | 0.38 | 2.56 | 0.01 | 0.01 | 0.36 | 0.00 | 0.73 | 1.83 |

|     | Glucose,g/100g | Fructose, g/100g | Sucrose,g/100g | Trehalose,g/100g | Melezitose,g/100g | Maltose,g/100g | Erllose,g/100g | Turanose,g/100g | Raffinose,g/100g | G/F  | G/M  |
|-----|----------------|------------------|----------------|------------------|-------------------|----------------|----------------|-----------------|------------------|------|------|
| A1  | 28.26          | 42.65            | 0.05           | 0.83             | 0.03              | 0.00           | 0.04           | 0.01            | 0.01             | 0.66 | 1.65 |
| A2  | 28.25          | 42.84            | 0.32           | 0.85             | 0.03              | 0.00           | 0.00           | 0.18            | 0.00             | 0.66 | 1.58 |
| A3  | 28.20          | 43.00            | 0.51           | 0.87             | 0.04              | 0.00           | 0.03           | 0.06            | 0.01             | 0.65 | 1.63 |
| A4  | 28.11          | 42.99            | 0.23           | 0.87             | 0.04              | 0.00           | 0.04           | 0.17            | 0.02             | 0.65 | 1.66 |
| A5  | 27.89          | 43.01            | 0.06           | 0.93             | 0.04              | 0.00           | 0.99           | 0.15            | 0.01             | 0.64 | 1.63 |
| A6  | 27.57          | 43.57            | 0.44           | 0.99             | 0.04              | 0.00           | 2.50           | 0.45            | 0.02             | 0.63 | 1.63 |
| A7  | 27.27          | 43.65            | 0.04           | 1.10             | 0.04              | 0.00           | 0.41           | 0.03            | 0.02             | 0.62 | 1.63 |
| A8  | 27.17          | 43.65            | 1.16           | 1.26             | 0.04              | 0.01           | 0.04           | 0.36            | 0.11             | 0.62 | 1.55 |
| A9  | 26.81          | 43.66            | 1.56           | 1.35             | 0.04              | 0.01           | 0.07           | 0.21            | 0.01             | 0.61 | 1.60 |
| A10 | 26.73          | 43.67            | 0.38           | 1.41             | 0.03              | 0.26           | 0.03           | 0.00            | 0.02             | 0.61 | 1.62 |
| A11 | 26.69          | 43.77            | 1.43           | 1.65             | 0.05              | 0.01           | 0.00           | 0.00            | 0.03             | 0.61 | 1.48 |
| A12 | 26.50          | 43.86            | 1.04           | 1.72             | 0.04              | 0.01           | 0.00           | 0.22            | 0.00             | 0.60 | 1.50 |
| A13 | 25.56          | 44.24            | 0.99           | 1.80             | 0.04              | 0.05           | 0.00           | 0.01            | 0.00             | 0.57 | 1.48 |
| A14 | 25.33          | 44.38            | 0.83           | 2.23             | 0.07              | 0.09           | 0.00           | 0.01            | 0.00             | 0.57 | 1.50 |
| A15 | 25.03          | 44.46            | 0.80           | 2.40             | 0.05              | 0.02           | 0.00           | 0.11            | 0.00             | 0.56 | 1.43 |
| A16 | 24.86          | 44.68            | 0.29           | 2.70             | 0.05              | 0.02           | 0.00           | 0.37            | 0.00             | 0.55 | 1.44 |
| A17 | 24.75          | 45.22            | 1.58           | 2.75             | 0.04              | 0.02           | 4.28           | 0.04            | 0.02             | 0.54 | 1.51 |
| A18 | 24.28          | 45.58            | 0.84           | 2.83             | 0.05              | 0.02           | 0.02           | 0.00            | 0.13             | 0.53 | 1.43 |
| A19 | 23.96          | 45.60            | 0.07           | 3.17             | 0.06              | 0.02           | 0.00           | 0.00            | 0.05             | 0.52 | 1.36 |
| A20 | 23.63          | 45.83            | 0.29           | 3.48             | 0.07              | 0.62           | 0.03           | 0.18            | 0.02             | 0.51 | 1.45 |
| A21 | 23.63          | 45.98            | 0.30           | 3.74             | 0.04              | 0.00           | 2.58           | 0.01            | 0.01             | 0.51 | 1.32 |
| G1  | 37.96          | 31.85            | 1.96           | 0.03             | 0.03              | 0.00           | 0.52           | 0.01            | 0.01             | 1.19 | 2.15 |
| G2  | 37.53          | 32.04            | 0.99           | 0.03             | 0.03              | 0.00           | 0.00           | 0.32            | 0.00             | 1.17 | 2.18 |
| G3  | 37.42          | 32.06            | 0.95           | 0.03             | 0.08              | 0.00           | 0.00           | 0.16            | 0.00             | 1.16 | 2.29 |
| G4  | 37.22          | 32.08            | 1.73           | 0.03             | 0.03              | 0.00           | 0.07           | 0.44            | 0.03             | 1.16 | 2.22 |
| G5  | 34.26          | 41.22            | 0.67           | 0.38             | 2.58              | 0.78           | 0.07           | 0.11            | 0.00             | 0.83 | 2.02 |
| G6  | 35.09          | 41.23            | 0.27           | 0.38             | 2.66              | 0.87           | 0.07           | 0.14            | 0.00             | 0.85 | 1.99 |
| G7  | 38.09          | 37.29            | 0.37           | 0.39             | 2.78              | 0.01           | 0.07           | 0.01            | 0.02             | 1.02 | 2.20 |
| G8  | 39.05          | 37.42            | 0.31           | 0.40             | 2.79              | 0.01           | 0.01           | 0.09            | 0.03             | 1.04 | 2.31 |
| G9  | 39.98          | 37.54            | 0.64           | 0.43             | 2.79              | 0.10           | 0.01           | 0.38            | 0.03             | 1.06 | 2.33 |

|     |       |       |      |      |      |      |      |      |      |      |      |
|-----|-------|-------|------|------|------|------|------|------|------|------|------|
| G10 | 34.49 | 38.58 | 0.30 | 0.47 | 2.82 | 0.06 | 0.02 | 0.43 | 0.03 | 0.89 | 2.04 |
| G11 | 34.36 | 39.69 | 0.68 | 0.47 | 2.86 | 0.33 | 0.00 | 0.11 | 0.04 | 0.86 | 2.05 |
| G12 | 36.34 | 38.71 | 0.33 | 0.47 | 3.11 | 0.06 | 0.02 | 0.11 | 0.01 | 0.94 | 2.12 |

Table S4 The results of the concentration of the twelve phenolic compounds

|     | Gallic acid, mg/100g | Protocatechuic acid, mg g/100g | 4- hydroxybenzoic acid, mg/100g | Vanilic acid, mg/100g | Chlorogenic acid. mg/100g | Caffeic acid, mg/100g | P-coumaric acid, mg/100g | Rosmarinic acid, mg/100g | Myricetin, mg/100g | Quercetin, mg/100g | Luteolin, mg/100g | Kaempferol, mg/100g | Total polyphenols, mg/100g | Total phenolic content Folin Ciocalteu, mg GAE/100g |
|-----|----------------------|--------------------------------|---------------------------------|-----------------------|---------------------------|-----------------------|--------------------------|--------------------------|--------------------|--------------------|-------------------|---------------------|----------------------------|-----------------------------------------------------|
| R1  | 0.00                 | 0.00                           | 0.00                            | 0.00                  | 0.00                      | 0.04                  | 0.04                     | 0.00                     | 0.00               | 0.00               | 0.00              | 0.00                | 0.08                       | 0.12                                                |
| R2  | 0.00                 | 0.00                           | 0.00                            | 0.00                  | 0.00                      | 0.09                  | 0.00                     | 0.00                     | 0.00               | 0.00               | 0.00              | 0.00                | 0.09                       | 0.12                                                |
| R3  | 0.00                 | 0.00                           | 0.00                            | 0.00                  | 0.00                      | 0.05                  | 0.03                     | 0.00                     | 0.00               | 0.00               | 0.00              | 0.00                | 0.09                       | 0.12                                                |
| R4  | 0.00                 | 0.00                           | 0.00                            | 0.00                  | 0.00                      | 0.00                  | 0.12                     | 0.00                     | 0.00               | 0.00               | 0.00              | 0.00                | 0.12                       | 0.15                                                |
| R5  | 0.00                 | 0.00                           | 0.00                            | 0.14                  | 0.00                      | 0.00                  | 0.00                     | 0.00                     | 0.00               | 0.00               | 0.00              | 0.00                | 0.14                       | 0.17                                                |
| R6  | 0.00                 | 0.00                           | 0.14                            | 0.00                  | 0.00                      | 0.00                  | 0.00                     | 0.00                     | 0.00               | 0.00               | 0.00              | 0.00                | 0.14                       | 0.17                                                |
| R7  | 0.00                 | 0.00                           | 0.00                            | 0.00                  | 0.00                      | 0.15                  | 0.00                     | 0.00                     | 0.00               | 0.00               | 0.00              | 0.00                | 0.15                       | 0.17                                                |
| R8  | 0.00                 | 0.00                           | 0.00                            | 0.00                  | 0.00                      | 0.10                  | 0.05                     | 0.00                     | 0.00               | 0.00               | 0.00              | 0.00                | 0.15                       | 0.17                                                |
| R9  | 0.00                 | 0.00                           | 0.00                            | 0.00                  | 0.00                      | 0.15                  | 0.00                     | 0.00                     | 0.00               | 0.00               | 0.00              | 0.00                | 0.15                       | 0.19                                                |
| R10 | 0.00                 | 0.00                           | 0.00                            | 0.00                  | 0.00                      | 0.00                  | 0.16                     | 0.00                     | 0.00               | 0.00               | 0.00              | 0.00                | 0.16                       | 0.17                                                |
| R11 | 0.00                 | 0.00                           | 0.00                            | 0.00                  | 0.17                      | 0.00                  | 0.00                     | 0.00                     | 0.00               | 0.00               | 0.00              | 0.00                | 0.17                       | 0.17                                                |
| R12 | 0.00                 | 0.00                           | 0.00                            | 0.00                  | 0.00                      | 0.11                  | 0.07                     | 0.00                     | 0.00               | 0.00               | 0.00              | 0.00                | 0.18                       | 0.18                                                |
| R13 | 0.07                 | 0.00                           | 0.00                            | 0.00                  | 0.13                      | 0.00                  | 0.00                     | 0.00                     | 0.00               | 0.00               | 0.00              | 0.00                | 0.20                       | 0.21                                                |
| R14 | 0.00                 | 0.21                           | 0.00                            | 0.00                  | 0.00                      | 0.00                  | 0.00                     | 0.00                     | 0.00               | 0.00               | 0.00              | 0.00                | 0.21                       | 0.22                                                |
| H1  | 0.02                 | 0.00                           | 0.00                            | 3.15                  | 0.00                      | 0.00                  | 0.23                     | 5.89                     | 2.34               | 2.67               | 0.00              | 0.55                | 14.87                      | 14.94                                               |
| H2  | 0.02                 | 0.00                           | 0.00                            | 4.42                  | 0.00                      | 0.37                  | 0.23                     | 5.01                     | 2.11               | 2.32               | 0.00              | 0.41                | 14.92                      | 14.95                                               |
| H3  | 0.35                 | 13.32                          | 0.00                            | 0.00                  | 0.10                      | 0.06                  | 0.05                     | 0.18                     | 0.33               | 0.00               | 0.71              | 0.00                | 15.12                      | 15.16                                               |
| H4  | 0.00                 | 6.51                           | 0.99                            | 0.00                  | 1.78                      | 0.47                  | 0.11                     | 0.00                     | 6.60               | 0.00               | 0.00              | 0.00                | 16.48                      | 16.56                                               |
| H5  | 0.61                 | 2.03                           | 0.65                            | 18.04                 | 1.16                      | 0.07                  | 0.07                     | 0.00                     | 0.00               | 0.00               | 0.00              | 1.18                | 23.85                      | 23.96                                               |
| H6  | 0.04                 | 0.08                           | 0.00                            | 1.21                  | 0.25                      | 0.00                  | 0.19                     | 3.28                     | 0.14               | 21.21              | 0.00              | 0.26                | 26.70                      | 26.78                                               |
| H7  | 0.00                 | 0.00                           | 0.00                            | 24.81                 | 0.00                      | 5.53                  | 0.00                     | 0.00                     | 0.00               | 0.00               | 0.00              | 0.00                | 30.34                      | 30.35                                               |
| H8  | 0.26                 | 0.00                           | 0.00                            | 0.00                  | 0.00                      | 0.20                  | 0.17                     | 51.11                    | 0.00               | 0.00               | 0.00              | 0.00                | 51.76                      | 51.78                                               |
| H9  | 0.00                 | 0.00                           | 0.00                            | 0.00                  | 0.00                      | 0.00                  | 0.02                     | 60.60                    | 19.75              | 0.00               | 0.00              | 0.00                | 80.38                      | 80.47                                               |
| P1  | 5.22                 | 0.52                           | 0.00                            | 0.00                  | 0.52                      | 0.10                  | 0.15                     | 0.00                     | 0.00               | 0.00               | 0.00              | 0.00                | 6.54                       | 6.55                                                |
| P2  | 0.00                 | 0.00                           | 0.00                            | 0.00                  | 0.00                      | 1.84                  | 0.26                     | 4.67                     | 0.00               | 0.00               | 0.00              | 0.00                | 6.78                       | 6.78                                                |
| P3  | 0.00                 | 0.06                           | 0.00                            | 0.00                  | 0.00                      | 0.00                  | 0.22                     | 4.66                     | 2.14               | 0.00               | 0.00              | 0.00                | 7.09                       | 7.15                                                |
| P4  | 0.02                 | 0.00                           | 0.00                            | 1.30                  | 0.00                      | 0.00                  | 0.23                     | 5.95                     | 0.00               | 0.00               | 0.00              | 0.00                | 7.51                       | 7.52                                                |
| P5  | 0.00                 | 0.00                           | 0.00                            | 0.00                  | 0.00                      | 0.00                  | 0.00                     | 0.00                     | 1.93               | 6.13               | 0.00              | 0.00                | 8.06                       | 8.12                                                |
| P6  | 5.23                 | 0.00                           | 0.00                            | 0.00                  | 0.00                      | 0.01                  | 2.32                     | 0.53                     | 0.00               | 0.00               | 0.00              | 0.00                | 8.11                       | 8.12                                                |
| P7  | 2.27                 | 0.65                           | 0.49                            | 1.91                  | 0.22                      | 0.12                  | 0.00                     | 2.27                     | 0.00               | 0.50               | 0.00              | 0.00                | 8.46                       | 8.49                                                |
| P8  | 5.21                 | 0.07                           | 0.52                            | 0.62                  | 1.16                      | 0.07                  | 0.07                     | 0.00                     | 0.00               | 0.00               | 0.00              | 1.21                | 8.98                       | 9.04                                                |
| P9  | 0.00                 | 0.04                           | 0.00                            | 2.27                  | 0.00                      | 0.00                  | 0.25                     | 5.45                     | 0.00               | 0.00               | 1.12              | 0.00                | 9.14                       | 9.16                                                |
| P10 | 0.01                 | 0.01                           | 0.00                            | 3.10                  | 0.00                      | 0.08                  | 0.18                     | 5.14                     | 0.36               | 0.00               | 0.00              | 0.41                | 9.32                       | 9.41                                                |
| P11 | 0.03                 | 0.08                           | 0.00                            | 1.28                  | 0.00                      | 0.00                  | 0.02                     | 4.46                     | 1.09               | 2.23               | 0.00              | 0.16                | 9.38                       | 9.40                                                |
| P12 | 0.02                 | 0.00                           | 0.00                            | 1.18                  | 0.00                      | 0.00                  | 0.21                     | 5.46                     | 2.26               | 0.31               | 0.00              | 0.44                | 9.91                       | 9.94                                                |
| P13 | 0.00                 | 0.01                           | 0.00                            | 2.41                  | 0.00                      | 0.00                  | 0.21                     | 4.88                     | 0.00               | 2.63               | 0.00              | 0.56                | 10.72                      | 10.73                                               |
| P14 | 2.29                 | 0.65                           | 0.28                            | 1.91                  | 0.19                      | 0.09                  | 0.00                     | 5.26                     | 0.00               | 0.55               | 0.00              | 0.00                | 11.23                      | 11.31                                               |
| P15 | 0.02                 | 0.08                           | 0.00                            | 0.97                  | 0.00                      | 0.00                  | 0.23                     | 5.52                     | 0.12               | 4.42               | 0.00              | 0.60                | 11.99                      | 12.36                                               |
| P16 | 0.00                 | 0.22                           | 0.00                            | 2.25                  | 0.00                      | 0.00                  | 0.25                     | 6.57                     | 0.14               | 2.86               | 0.00              | 0.48                | 12.81                      | 12.94                                               |
| L1  | 0.00                 | 0.63                           | 0.00                            | 0.00                  | 0.00                      | 0.28                  | 0.00                     | 0.02                     | 0.00               | 0.00               | 0.00              | 0.00                | 0.94                       | 0.99                                                |

|     |      |      |      |       |      |      |       |      |      |      |      |      |       |       |
|-----|------|------|------|-------|------|------|-------|------|------|------|------|------|-------|-------|
| L2  | 0.64 | 0.29 | 0.00 | 0.00  | 0.00 | 0.03 | 0.00  | 0.00 | 0.00 | 0.00 | 0.00 | 0.00 | 0.97  | 1.06  |
| L3  | 0.14 | 0.89 | 0.00 | 0.00  | 0.13 | 0.00 | 0.00  | 0.00 | 0.00 | 0.00 | 0.00 | 0.00 | 1.18  | 1.31  |
| L4  | 1.27 | 0.00 | 0.00 | 0.00  | 0.00 | 0.00 | 0.00  | 0.00 | 0.00 | 0.00 | 0.00 | 0.00 | 1.27  | 1.30  |
| L5  | 1.42 | 0.00 | 0.00 | 0.00  | 0.00 | 0.00 | 0.00  | 0.00 | 0.00 | 0.00 | 0.00 | 0.00 | 1.42  | 1.44  |
| L6  | 1.66 | 0.00 | 0.00 | 0.00  | 0.00 | 0.00 | 0.00  | 0.00 | 0.00 | 0.00 | 0.00 | 0.00 | 1.66  | 1.68  |
| L7  | 0.00 | 0.00 | 0.00 | 0.00  | 0.00 | 0.03 | 1.25  | 0.00 | 0.41 | 0.00 | 0.00 | 0.00 | 1.70  | 1.72  |
| L8  | 0.00 | 0.00 | 0.00 | 0.00  | 0.10 | 0.04 | 0.00  | 0.00 | 1.59 | 0.00 | 0.00 | 0.00 | 1.75  | 1.78  |
| L9  | 0.32 | 0.00 | 0.00 | 0.00  | 0.00 | 1.20 | 0.26  | 0.00 | 0.00 | 0.00 | 0.00 | 0.00 | 1.78  | 1.79  |
| L10 | 1.79 | 0.00 | 0.00 | 0.00  | 0.00 | 0.00 | 0.00  | 0.00 | 0.00 | 0.00 | 0.00 | 0.00 | 1.79  | 1.79  |
| L11 | 0.00 | 0.00 | 0.00 | 0.00  | 0.00 | 0.49 | 0.37  | 0.00 | 0.94 | 0.00 | 0.00 | 0.00 | 1.81  | 1.90  |
| L12 | 1.06 | 0.21 | 0.50 | 0.00  | 0.22 | 0.00 | 0.00  | 0.10 | 0.00 | 0.00 | 0.00 | 0.00 | 2.10  | 2.14  |
| L13 | 2.13 | 0.00 | 0.00 | 0.00  | 0.00 | 0.00 | 0.00  | 0.00 | 0.00 | 0.00 | 0.00 | 0.00 | 2.13  | 2.18  |
| L14 | 0.00 | 0.00 | 0.00 | 0.00  | 0.17 | 0.09 | 0.44  | 0.00 | 1.31 | 0.00 | 0.00 | 0.20 | 2.23  | 2.26  |
| L15 | 3.96 | 0.00 | 0.00 | 0.00  | 0.00 | 0.00 | 0.00  | 0.00 | 0.00 | 0.00 | 0.00 | 0.00 | 3.96  | 3.98  |
| L16 | 3.97 | 0.00 | 0.00 | 0.00  | 0.00 | 0.00 | 0.01  | 0.00 | 0.00 | 0.00 | 0.00 | 0.00 | 3.98  | 4.02  |
| L17 | 0.00 | 0.00 | 0.30 | 0.00  | 0.00 | 0.00 | 0.00  | 4.67 | 0.00 | 0.00 | 0.00 | 0.00 | 4.98  | 5.04  |
| L18 | 2.33 | 0.00 | 0.00 | 0.00  | 0.00 | 0.00 | 0.00  | 0.68 | 1.92 | 0.06 | 0.00 | 0.00 | 5.01  | 5.05  |
| L19 | 2.33 | 0.66 | 0.16 | 0.00  | 0.27 | 0.04 | 0.00  | 1.03 | 0.32 | 0.48 | 0.00 | 0.00 | 5.32  | 5.35  |
| L20 | 0.01 | 1.72 | 0.50 | 0.00  | 2.15 | 0.00 | 0.00  | 1.02 | 0.00 | 0.00 | 0.00 | 0.00 | 5.42  | 5.49  |
| L21 | 0.00 | 0.20 | 0.54 | 0.00  | 0.19 | 0.00 | 0.10  | 4.40 | 0.00 | 0.00 | 0.00 | 0.00 | 5.44  | 5.49  |
| A1  | 0.20 | 0.00 | 0.00 | 0.00  | 0.00 | 0.00 | 0.00  | 0.00 | 0.00 | 0.00 | 0.00 | 0.00 | 0.20  | 0.28  |
| A2  | 0.00 | 0.00 | 0.02 | 0.00  | 0.00 | 0.00 | 0.00  | 0.00 | 0.00 | 0.00 | 0.00 | 0.00 | 0.02  | 0.04  |
| A3  | 0.00 | 0.00 | 0.00 | 0.00  | 0.00 | 0.00 | 0.29  | 0.00 | 0.00 | 0.00 | 0.00 | 0.00 | 0.28  | 0.32  |
| A4  | 0.00 | 0.00 | 0.00 | 0.00  | 0.00 | 0.04 | 0.00  | 0.00 | 0.00 | 0.00 | 0.00 | 0.00 | 0.04  | 0.05  |
| A5  | 0.00 | 0.00 | 0.00 | 0.00  | 0.00 | 0.00 | 0.04  | 0.00 | 0.00 | 0.00 | 0.00 | 0.00 | 0.04  | 0.07  |
| A6  | 0.00 | 0.00 | 0.00 | 0.00  | 0.00 | 0.04 | 0.00  | 0.00 | 0.00 | 0.00 | 0.00 | 0.00 | 0.04  | 0.06  |
| A7  | 0.00 | 0.00 | 0.00 | 0.00  | 0.00 | 0.05 | 0.00  | 0.00 | 0.00 | 0.00 | 0.00 | 0.00 | 0.05  | 0.06  |
| A8  | 0.00 | 0.00 | 0.00 | 0.00  | 0.00 | 0.05 | 0.00  | 0.00 | 0.00 | 0.00 | 0.00 | 0.00 | 0.05  | 0.07  |
| A9  | 0.00 | 0.00 | 0.00 | 0.00  | 0.00 | 0.05 | 0.00  | 0.00 | 0.00 | 0.00 | 0.00 | 0.00 | 0.05  | 0.08  |
| A10 | 0.00 | 0.00 | 0.00 | 0.00  | 0.00 | 0.05 | 0.00  | 0.00 | 0.00 | 0.00 | 0.00 | 0.00 | 0.05  | 0.07  |
| A11 | 0.00 | 0.00 | 0.00 | 0.00  | 0.06 | 0.00 | 0.00  | 0.00 | 0.00 | 0.00 | 0.00 | 0.00 | 0.06  | 0.08  |
| A12 | 0.06 | 0.00 | 0.00 | 0.00  | 0.00 | 0.00 | 0.00  | 0.00 | 0.00 | 0.00 | 0.00 | 0.00 | 0.06  | 0.09  |
| A13 | 0.00 | 0.00 | 0.00 | 0.00  | 0.00 | 0.06 | 0.00  | 0.00 | 0.00 | 0.00 | 0.00 | 0.00 | 0.06  | 0.12  |
| A14 | 0.00 | 0.00 | 0.00 | 0.00  | 0.00 | 0.06 | 0.00  | 0.00 | 0.00 | 0.00 | 0.00 | 0.00 | 0.06  | 0.09  |
| A15 | 0.00 | 0.00 | 0.00 | 0.00  | 0.00 | 0.04 | 0.03  | 0.00 | 0.00 | 0.00 | 0.00 | 0.00 | 0.07  | 0.09  |
| A16 | 0.00 | 0.00 | 0.00 | 0.00  | 0.00 | 0.06 | 0.02  | 0.00 | 0.00 | 0.00 | 0.00 | 0.00 | 0.07  | 0.11  |
| A17 | 0.08 | 0.00 | 0.00 | 0.00  | 0.00 | 0.00 | 0.00  | 0.00 | 0.00 | 0.00 | 0.00 | 0.00 | 0.08  | 0.10  |
| A18 | 0.00 | 0.00 | 0.00 | 0.00  | 0.00 | 0.08 | 0.00  | 0.00 | 0.00 | 0.00 | 0.00 | 0.00 | 0.08  | 0.09  |
| A19 | 0.00 | 0.00 | 0.00 | 0.09  | 0.00 | 0.00 | 0.00  | 0.00 | 0.00 | 0.00 | 0.00 | 0.00 | 0.09  | 0.10  |
| A20 | 0.00 | 0.00 | 0.00 | 0.00  | 0.00 | 0.09 | 0.00  | 0.00 | 0.00 | 0.00 | 0.00 | 0.00 | 0.09  | 0.11  |
| A21 | 0.00 | 0.00 | 0.00 | 0.00  | 0.14 | 0.00 | 0.00  | 0.00 | 0.00 | 0.00 | 0.00 | 0.00 | 0.14  | 0.16  |
| G1  | 0.01 | 0.00 | 0.00 | 3.16  | 0.00 | 0.05 | 0.23  | 5.16 | 2.67 | 2.46 | 0.92 | 0.00 | 14.67 | 14.69 |
| G2  | 0.00 | 0.16 | 0.00 | 12.76 | 0.00 | 0.00 | 0.27  | 6.02 | 0.48 | 4.26 | 0.00 | 0.87 | 24.81 | 24.82 |
| G3  | 0.00 | 4.03 | 4.78 | 0.00  | 4.67 | 1.59 | 24.23 | 0.00 | 0.00 | 0.00 | 0.00 | 0.00 | 39.30 | 39.33 |
| G4  | 0.00 | 0.00 | 0.00 | 44.81 | 0.00 | 0.00 | 0.00  | 1.04 | 0.00 | 0.00 | 0.00 | 0.00 | 45.85 | 45.88 |
| G5  | 0.00 | 0.05 | 0.00 | 3.00  | 0.00 | 0.00 | 0.22  | 4.94 | 2.11 | 2.20 | 0.00 | 0.45 | 12.97 | 13.01 |
| G6  | 0.04 | 0.05 | 0.00 | 3.10  | 0.00 | 0.00 | 0.24  | 5.51 | 2.24 | 2.32 | 0.00 | 0.05 | 13.54 | 13.57 |
| G7  | 5.23 | 8.85 | 0.00 | 0.00  | 0.00 | 0.00 | 0.00  | 0.00 | 0.00 | 0.00 | 0.00 | 0.00 | 14.08 | 14.12 |
| G8  | 0.02 | 0.01 | 0.00 | 7.25  | 0.00 | 0.00 | 0.02  | 6.02 | 0.69 | 0.00 | 0.00 | 0.47 | 14.47 | 14.53 |
| G9  | 0.02 | 0.00 | 0.00 | 2.55  | 0.00 | 0.00 | 0.23  | 6.23 | 2.42 | 2.65 | 0.00 | 0.55 | 14.65 | 14.66 |
| G10 | 0.00 | 7.27 | 0.00 | 1.11  | 0.00 | 0.00 | 0.03  | 5.30 | 0.39 | 0.00 | 0.00 | 4.53 | 18.62 | 18.68 |
| G11 | 0.76 | 0.00 | 0.00 | 0.30  | 0.25 | 0.09 | 19.93 | 0.00 | 0.00 | 0.00 | 0.73 | 0.00 | 22.04 | 22.15 |
| G12 | 0.24 | 7.28 | 1.44 | 10.19 | 0.00 | 3.56 | 0.00  | 0.00 | 0.00 | 0.00 | 0.00 | 0.30 | 23.01 | 23.09 |



|     |      |      |      |      |      |      |      |      |      |      |      |      |      |      |
|-----|------|------|------|------|------|------|------|------|------|------|------|------|------|------|
| L16 | 3.97 | 0.00 | 0.00 | 0.00 | 0.00 | 0.00 | 0.00 | 0.01 | 0.00 | 0.00 | 0.00 | 0.00 | 0.00 | 3.98 |
| L17 | 0.00 | 0.00 | 0.30 | 0.00 | 0.00 | 0.00 | 0.00 | 0.00 | 4.67 | 0.00 | 0.00 | 0.00 | 0.00 | 4.98 |
| L18 | 2.33 | 0.00 | 0.00 | 0.00 | 0.00 | 0.00 | 0.00 | 0.00 | 0.68 | 1.92 | 0.06 | 0.00 | 0.00 | 5.01 |
| L19 | 2.33 | 0.66 | 0.16 | 0.00 | 0.27 | 0.04 | 0.00 | 0.00 | 1.03 | 0.32 | 0.48 | 0.00 | 0.00 | 5.32 |
| L20 | 0.01 | 1.72 | 0.50 | 0.00 | 2.15 | 0.00 | 0.00 | 0.00 | 1.02 | 0.00 | 0.00 | 0.00 | 0.00 | 5.42 |
| L21 | 0.00 | 0.20 | 0.54 | 0.00 | 0.19 | 0.00 | 0.10 | 0.00 | 4.40 | 0.00 | 0.00 | 0.00 | 0.00 | 5.44 |
| A1  | 0.20 | 0.00 | 0.00 | 0.00 | 0.00 | 0.00 | 0.00 | 0.00 | 0.00 | 0.00 | 0.00 | 0.00 | 0.00 | 0.20 |
| A2  | 0.00 | 0.00 | 0.02 | 0.00 | 0.00 | 0.00 | 0.00 | 0.00 | 0.00 | 0.00 | 0.00 | 0.00 | 0.00 | 0.02 |
| A3  | 0.00 | 0.00 | 0.00 | 0.00 | 0.00 | 0.00 | 0.29 | 0.00 | 0.00 | 0.00 | 0.00 | 0.00 | 0.00 | 0.28 |
| A4  | 0.00 | 0.00 | 0.00 | 0.00 | 0.00 | 0.04 | 0.00 | 0.00 | 0.00 | 0.00 | 0.00 | 0.00 | 0.00 | 0.04 |
| A5  | 0.00 | 0.00 | 0.00 | 0.00 | 0.00 | 0.00 | 0.04 | 0.00 | 0.00 | 0.00 | 0.00 | 0.00 | 0.00 | 0.04 |
| A6  | 0.00 | 0.00 | 0.00 | 0.00 | 0.00 | 0.04 | 0.00 | 0.00 | 0.00 | 0.00 | 0.00 | 0.00 | 0.00 | 0.04 |
| A7  | 0.00 | 0.00 | 0.00 | 0.00 | 0.00 | 0.05 | 0.00 | 0.00 | 0.00 | 0.00 | 0.00 | 0.00 | 0.00 | 0.05 |
| A8  | 0.00 | 0.00 | 0.00 | 0.00 | 0.00 | 0.05 | 0.00 | 0.00 | 0.00 | 0.00 | 0.00 | 0.00 | 0.00 | 0.05 |
| A9  | 0.00 | 0.00 | 0.00 | 0.00 | 0.00 | 0.05 | 0.00 | 0.00 | 0.00 | 0.00 | 0.00 | 0.00 | 0.00 | 0.05 |
| A10 | 0.00 | 0.00 | 0.00 | 0.00 | 0.00 | 0.05 | 0.00 | 0.00 | 0.00 | 0.00 | 0.00 | 0.00 | 0.00 | 0.05 |
| A11 | 0.00 | 0.00 | 0.00 | 0.00 | 0.06 | 0.00 | 0.00 | 0.00 | 0.00 | 0.00 | 0.00 | 0.00 | 0.00 | 0.06 |
| A12 | 0.06 | 0.00 | 0.00 | 0.00 | 0.00 | 0.00 | 0.00 | 0.00 | 0.00 | 0.00 | 0.00 | 0.00 | 0.00 | 0.06 |
| A13 | 0.00 | 0.00 | 0.00 | 0.00 | 0.00 | 0.06 | 0.00 | 0.00 | 0.00 | 0.00 | 0.00 | 0.00 | 0.00 | 0.06 |
| A14 | 0.00 | 0.00 | 0.00 | 0.00 | 0.00 | 0.06 | 0.00 | 0.00 | 0.00 | 0.00 | 0.00 | 0.00 | 0.00 | 0.06 |
| A15 | 0.00 | 0.00 | 0.00 | 0.00 | 0.00 | 0.04 | 0.03 | 0.00 | 0.00 | 0.00 | 0.00 | 0.00 | 0.00 | 0.07 |
| A16 | 0.00 | 0.00 | 0.00 | 0.00 | 0.00 | 0.06 | 0.02 | 0.00 | 0.00 | 0.00 | 0.00 | 0.00 | 0.00 | 0.07 |
| A17 | 0.08 | 0.00 | 0.00 | 0.00 | 0.00 | 0.00 | 0.00 | 0.00 | 0.00 | 0.00 | 0.00 | 0.00 | 0.00 | 0.08 |
| A18 | 0.00 | 0.00 | 0.00 | 0.00 | 0.00 | 0.08 | 0.00 | 0.00 | 0.00 | 0.00 | 0.00 | 0.00 | 0.00 | 0.08 |
| A19 | 0.00 | 0.00 | 0.00 | 0.09 | 0.00 | 0.00 | 0.00 | 0.00 | 0.00 | 0.00 | 0.00 | 0.00 | 0.00 | 0.09 |
| A20 | 0.00 | 0.00 | 0.00 | 0.00 | 0.00 | 0.09 | 0.00 | 0.00 | 0.00 | 0.00 | 0.00 | 0.00 | 0.00 | 0.09 |
| A21 | 0.00 | 0.00 | 0.00 | 0.00 | 0.14 | 0.00 | 0.00 | 0.00 | 0.00 | 0.00 | 0.00 | 0.00 | 0.00 | 0.14 |

| Sample | Gallic acid, mg/100g | Protocatechuic acid, mg/100g | 4- hydroxybenzoic acid,mg/100g | Vanillic acid, mg/100g | Chlorogenic acid, mg/100g | Caffeic acid, mg/100g | P-coumaric acid, mg/100g | Rosmarinic acid, mg/100g | Myricetin, mg/100g | Quercetin, mg/100g | Luteolin, mg/100g | Kaempferol, mg/100g | Total polyphenols, mg/100g |
|--------|----------------------|------------------------------|--------------------------------|------------------------|---------------------------|-----------------------|--------------------------|--------------------------|--------------------|--------------------|-------------------|---------------------|----------------------------|
| G1     | 0.01                 | 0.00                         | 0.00                           | 3.16                   | 0.00                      | 0.05                  | 0.23                     | 5.16                     | 2.67               | 2.46               | 0.92              | 0.00                | 14.67                      |
| G2     | 0.00                 | 0.16                         | 0.00                           | 12.76                  | 0.00                      | 0.00                  | 0.27                     | 6.02                     | 0.48               | 4.26               | 0.00              | 0.87                | 24.81                      |
| G3     | 0.00                 | 4.03                         | 4.78                           | 0.00                   | 4.67                      | 1.59                  | 24.23                    | 0.00                     | 0.00               | 0.00               | 0.00              | 0.00                | 39.30                      |
| G4     | 0.00                 | 0.00                         | 0.00                           | 44.81                  | 0.00                      | 0.00                  | 0.00                     | 1.04                     | 0.00               | 0.00               | 0.00              | 0.00                | 45.85                      |
| G5     | 0.00                 | 0.05                         | 0.00                           | 3.00                   | 0.00                      | 0.00                  | 0.22                     | 4.94                     | 2.11               | 2.20               | 0.00              | 0.45                | 12.97                      |
| G6     | 0.04                 | 0.05                         | 0.00                           | 3.10                   | 0.00                      | 0.00                  | 0.24                     | 5.51                     | 2.24               | 2.32               | 0.00              | 0.05                | 13.54                      |
| G7     | 5.23                 | 8.85                         | 0.00                           | 0.00                   | 0.00                      | 0.00                  | 0.00                     | 0.00                     | 0.00               | 0.00               | 0.00              | 0.00                | 14.08                      |
| G8     | 0.02                 | 0.01                         | 0.00                           | 7.25                   | 0.00                      | 0.00                  | 0.02                     | 6.02                     | 0.69               | 0.00               | 0.00              | 0.47                | 14.47                      |
| G9     | 0.02                 | 0.00                         | 0.00                           | 2.55                   | 0.00                      | 0.00                  | 0.23                     | 6.23                     | 2.42               | 2.65               | 0.00              | 0.55                | 14.65                      |
| G10    | 0.00                 | 7.27                         | 0.00                           | 1.11                   | 0.00                      | 0.00                  | 0.03                     | 5.30                     | 0.39               | 0.00               | 0.00              | 4.53                | 18.62                      |
| G11    | 0.76                 | 0.00                         | 0.00                           | 0.30                   | 0.25                      | 0.09                  | 19.93                    | 0.00                     | 0.00               | 0.00               | 0.73              | 0.00                | 22.04                      |
| G12    | 0.24                 | 7.28                         | 1.44                           | 10.19                  | 0.00                      | 3.56                  | 0.00                     | 0.00                     | 0.00               | 0.00               | 0.00              | 0.30                | 23.01                      |
